# Supplementary material for: Electrocatalytic, photocatalytic, fluorescence sensing and CO2RR properties of a series of homopolymolybdate hybrid coordination polymers
Source: Royal Society of Chemistry journal article supplement (doi:10.1039/d1nj02283k), 2021-01-01
Supplement: d1nj02283k1.pdf [file d1nj02283k1.pdf]

# Electrocatalytic, photocatalytic, fluorescence sensing and CO<sub>2</sub>RR properties of a series of homopolymolybdate hybrid coordination polymers

Baoyue Zhang,<sup>a</sup> Jun Ying,<sup>a,\*</sup> Xinyue Zhang,<sup>a</sup> Chen Wang<sup>a</sup>, Aixiang Tian<sup>a,\*</sup>

**Table S1.** Selected bond distances (Å) and angles (°) for coordination polymers 1–4.

| 1                                       |            |                      |           |
|-----------------------------------------|------------|----------------------|-----------|
| Cu(1)-O(1)#2                            | 1.916(5)   | Cu(1)-N(1)#2         | 1.914(8)  |
| Cu(1)-O(1)                              | 1.916(5)   | Cu(1)-N(1)           | 1.914(8)  |
| O(1)#2-Cu(1)-O(1)                       | 180.00(18) | N(1)#2-Cu(1)-O(1)#2  | 87.0(3)   |
| N(1)-Cu(1)-O(1)                         | 87.0(3)    | N(1)#2-Cu(1)-O(1)    | 93.0(3)   |
| N(1)-Cu(1)-O(1)#2                       | 93.0(3)    | N(1)-Cu(1)-N(1)#2    | 180.0(5)  |
| Mo(14)-O(1)-Cu(1)                       | 139.0(3)   | N(2)-N(1)-Cu(1)      | 119.6(5)  |
| Symmetry codes for 1: #1 -x+1,-y+1,-z+1 |            | #2 -x+1,-y+1,-z+2    |           |
| 2                                       |            |                      |           |
| Zn(1)-O(13)                             | 2.135(4)   | Zn(1)-O(14)#2        | 2.108(5)  |
| Zn(1)-O(13)#2                           | 2.135(4)   | Zn(1)-N(1)           | 2.098(6)  |
| Zn(1)-O(14)                             | 2.108(5)   | Zn(1)-N(1)#2         | 2.098(6)  |
| O(13)-Zn(1)-O(13)#2                     | 180.0      | N(1)#2-Zn(1)-O(13)   | 82.67(16) |
| O(14)-Zn(1)-O(13)                       | 93.45(17)  | N(1)-Zn(1)-O(13)#2   | 82.67(16) |
| O(14)-Zn(1)-O(13)#2                     | 86.55(17)  | N(1)-Zn(1)-O(13)     | 97.33(16) |
| O(14)#2-Zn(1)-O(13)#2                   | 93.46(17)  | N(1)#2-Zn(1)-O(13)#2 | 97.33(16) |
| O(14)#2-Zn(1)-O(13)                     | 86.54(17)  | N(1)#2-Zn(1)-O(14)   | 86.6(2)   |
| O(14)-Zn(1)-O(14)#2                     | 180.0      | N(1)#2-Zn(1)-O(14)#2 | 93.4(2)   |
| Symmetry codes for 2: #1 -x+1,-y+1,-z   |            | #2 -x+1,-y+1,-z+1    |           |
| 3                                       |            |                      |           |
| O(15)-Cu(1)                             | 1.962(3)   | O(17)-Cu(2)          | 1.974(3)  |
| O(16)-Cu(1)                             | 1.990(3)   | O(14)-Cu(1)          | 1.939(3)  |
| O(20)-Cu(2)                             | 1.988(3)   | O(18)-Cu(2)          | 1.938(3)  |
| Cu(1)-N(1)                              | 1.990(3)   | Cu(2)-N(2)#2         | 2.320(3)  |
| Cu(1)-N(3)                              | 2.390(3)   | Cu(2)-N(4)           | 2.007(3)  |
| O(15)-Cu(1)-O(16)                       | 94.55(14)  | O(14)-Cu(1)-N(1)     | 81.66(12) |
| O(15)-Cu(1)-N(1)                        | 93.95(13)  | O(14)-Cu(1)-N(3)     | 92.30(12) |

|                   |            |                   |            |
|-------------------|------------|-------------------|------------|
| O(15)-Cu(1)-N(3)  | 93.45(12)  | N(1)-Cu(1)-O(16)  | 164.71(13) |
| O(16)-Cu(1)-N(3)  | 88.23(11)  | N(1)-Cu(1)-N(3)   | 103.92(11) |
| O(14)-Cu(1)-O(15) | 173.47(12) | O(20)-Cu(2)-N(4)  | 160.64(12) |
| O(14)-Cu(1)-O(16) | 88.72(13)  | O(17)-Cu(2)-O(20) | 95.94(12)  |

Symmetry codes for **3**: #1 -x+1,-y-2,-z #2 x-1,y,z #3 x+1,y,z

#### 4

|                   |            |                     |            |
|-------------------|------------|---------------------|------------|
| Cu(1)-O(3)        | 2.0603(15) | Cu(1)-O(4)#2        | 2.3249(15) |
| Cu(1)-O(6)        | 1.9742(15) | Cu(1)-N(1)          | 2.0001(19) |
| Cu(1)-O(5)#1      | 2.3036(15) | Cu(1)-N(2)          | 1.9761(19) |
| O(3)-Cu(1)-O(5)#1 | 75.43(6)   | O(6)-Cu(1)-N(2)     | 92.32(7)   |
| O(3)-Cu(1)-O(4)#2 | 74.39(6)   | O(5)#1-Cu(1)-O(4)#2 | 147.09(6)  |
| O(6)-Cu(1)-O(3)   | 89.32(6)   | N(1)-Cu(1)-O(3)     | 96.97(7)   |
| O(6)-Cu(1)-O(5)#1 | 83.84(6)   | N(1)-Cu(1)-O(5)#1   | 101.82(7)  |
| O(6)-Cu(1)-O(4)#2 | 83.00(6)   | N(1)-Cu(1)-O(4)#2   | 94.56(7)   |
| O(6)-Cu(1)-N(1)   | 172.41(7)  | O(6)-Cu(1)-N(2)     | 92.32(7)   |
| N(2)-Cu(1)-O(3)   | 178.17(7)  | N(2)-Cu(1)-O(4)#2   | 106.60(7)  |
| N(2)-Cu(1)-O(5)#1 | 103.95(7)  | N(2)-Cu(1)-N(1)     | 81.45(8)   |

Symmetry codes for **4**: #1 x,-y+1/2,z+1/2 #2 x,-y+1/2,z-1/2

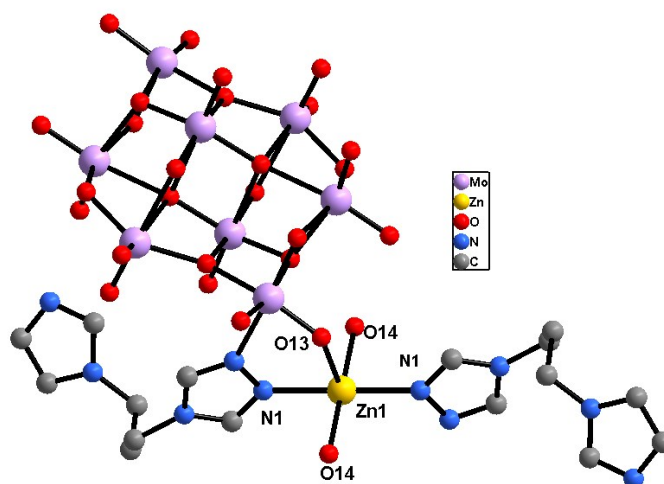

**Fig. S1.** Ball/stick diagram of the asymmetric unit of coordination polymer **2**. The hydrogen atoms are omitted for clarity.

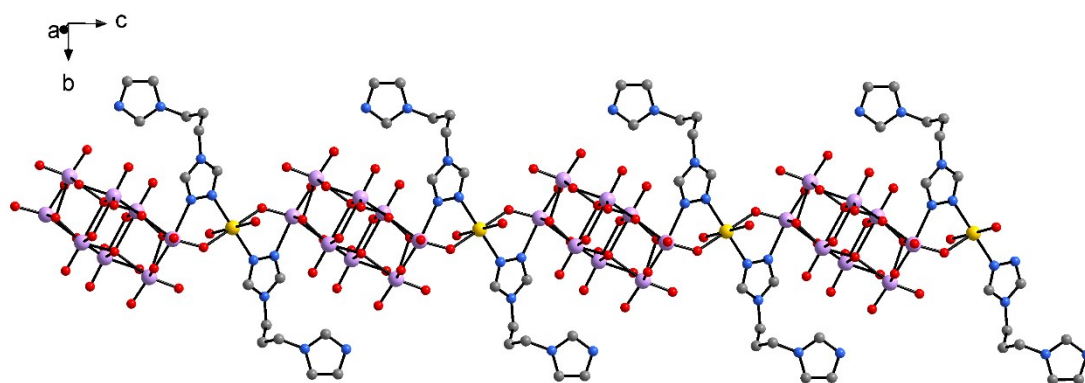

**Fig. S2.** The 1D chain of coordination polymer **2**.

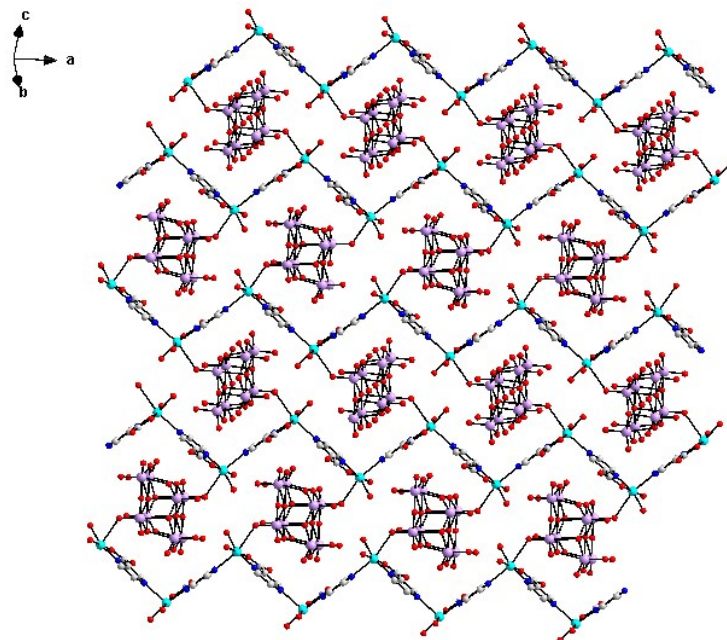

**Fig. S3.** The 2D layer of coordination polymer **3**.

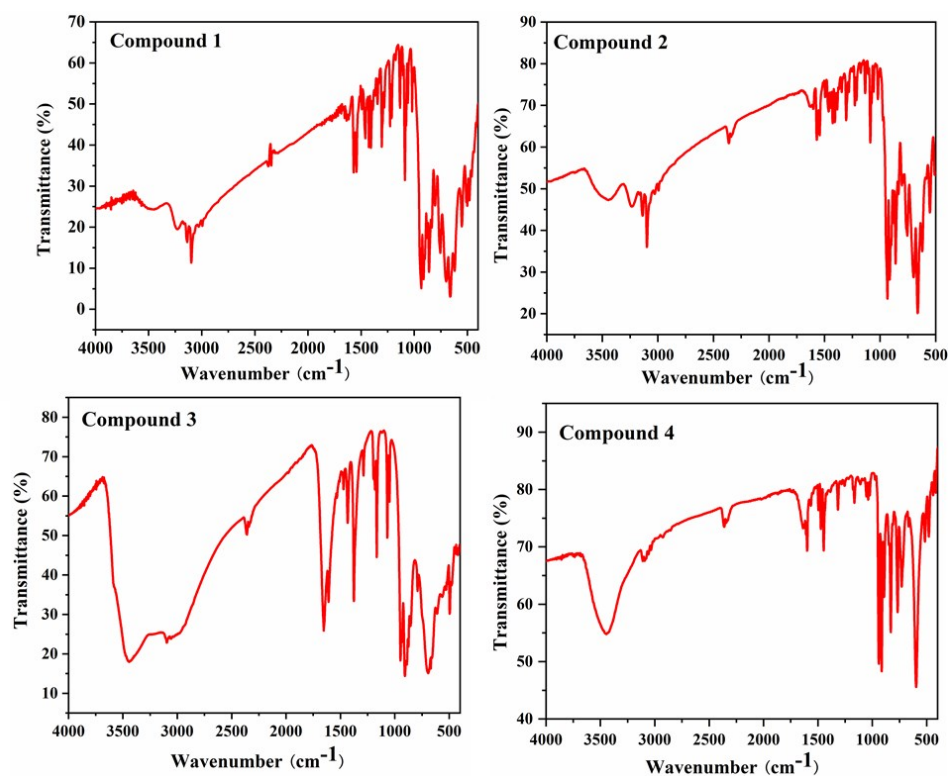

**Fig. S4.** The IR spectra of coordination polymers 1–4.

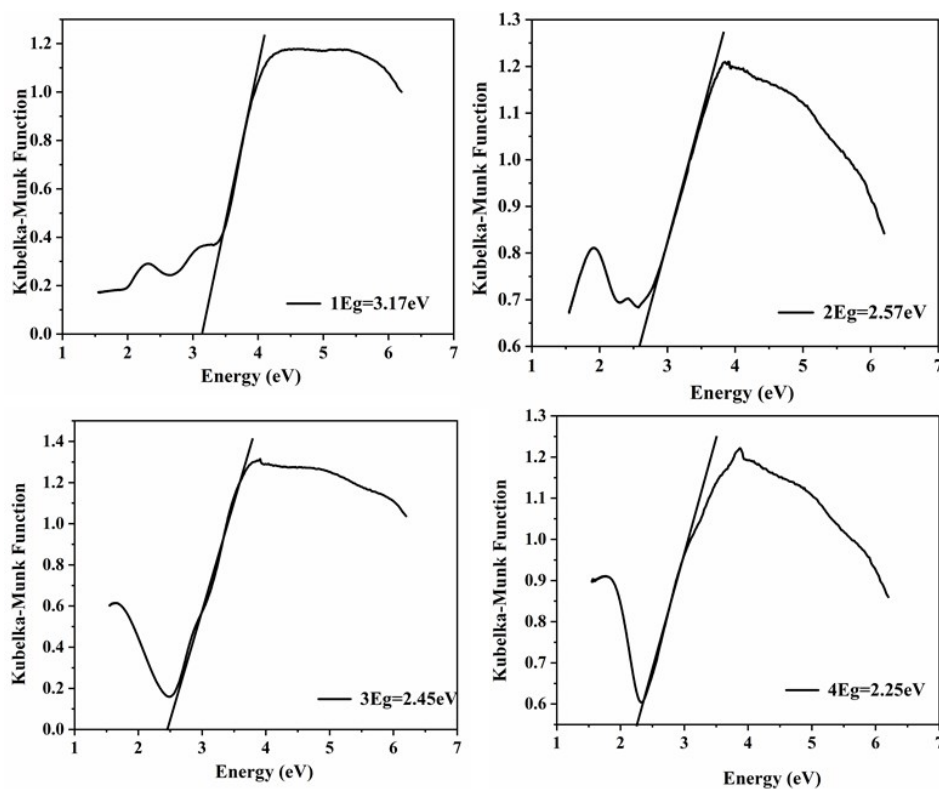

**Fig. S5.** Solid-state optical diffuse-reflection spectra of coordination polymers 1–4 derived from diffuse reflectance data at room temperature.

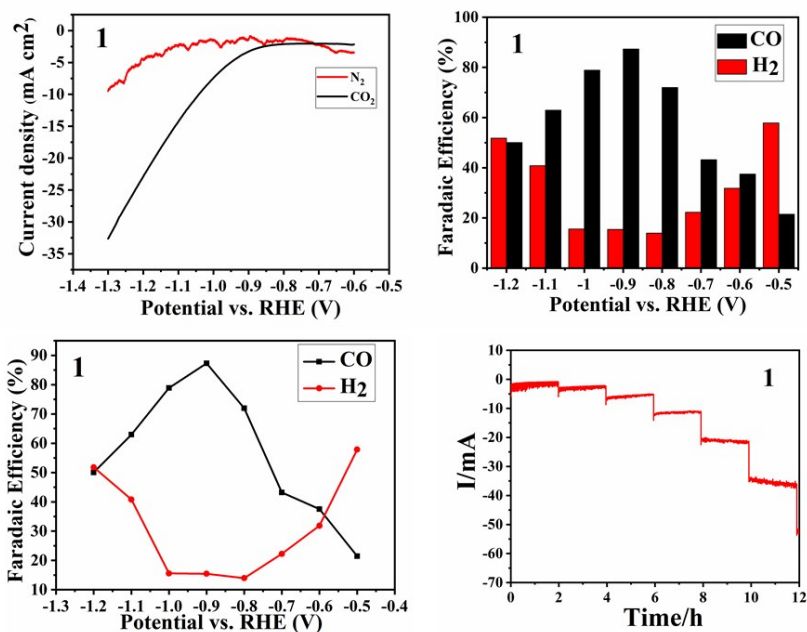

**Fig. S6.** (a) LSV curves of coordination polymer **1** in CO<sub>2</sub>-saturated and N<sub>2</sub>-saturated 0.5 M KHCO<sub>3</sub> electrolyte on carbon paper at a scan rate of 5 mV s<sup>-1</sup>. (b) The FE of **1** for CO (red bars) and H<sub>2</sub> (black bars). (c) The FE of CO and H<sub>2</sub> products on **1** at selected potentials. (d) The i-t curve of **1** during the electrolysis.

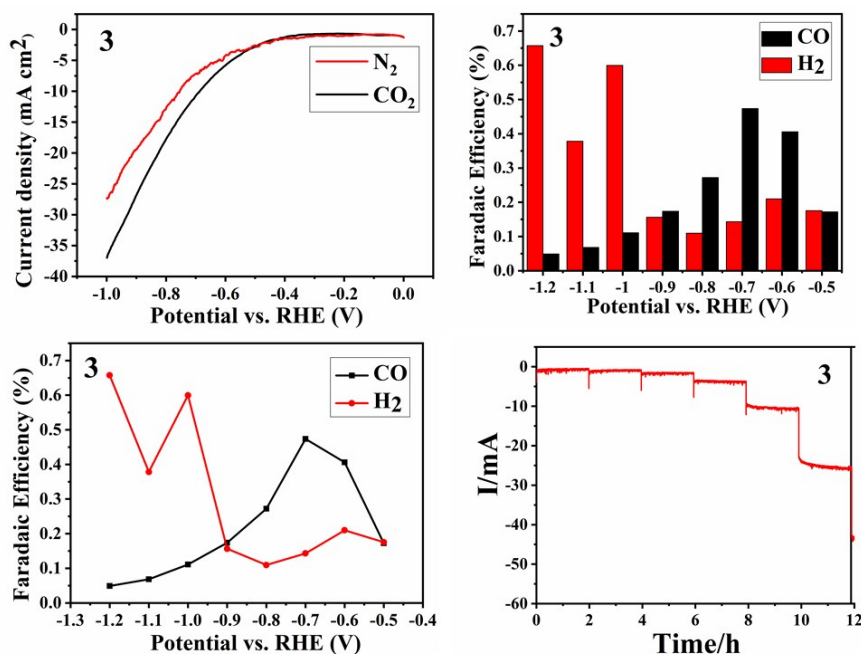

**Fig. S7.** (a) LSV curves of coordination polymer **3** in CO<sub>2</sub>-saturated and N<sub>2</sub>-saturated 0.5 M KHCO<sub>3</sub> electrolyte on carbon paper at a scan rate of 5 mV s<sup>-1</sup>. (b) The FE of **3** for CO (red bars) and H<sub>2</sub> (black bars). (c) The FE of CO and H<sub>2</sub> products on **3** at selected potentials. (d) The i-t curve of **3** during the electrolysis.

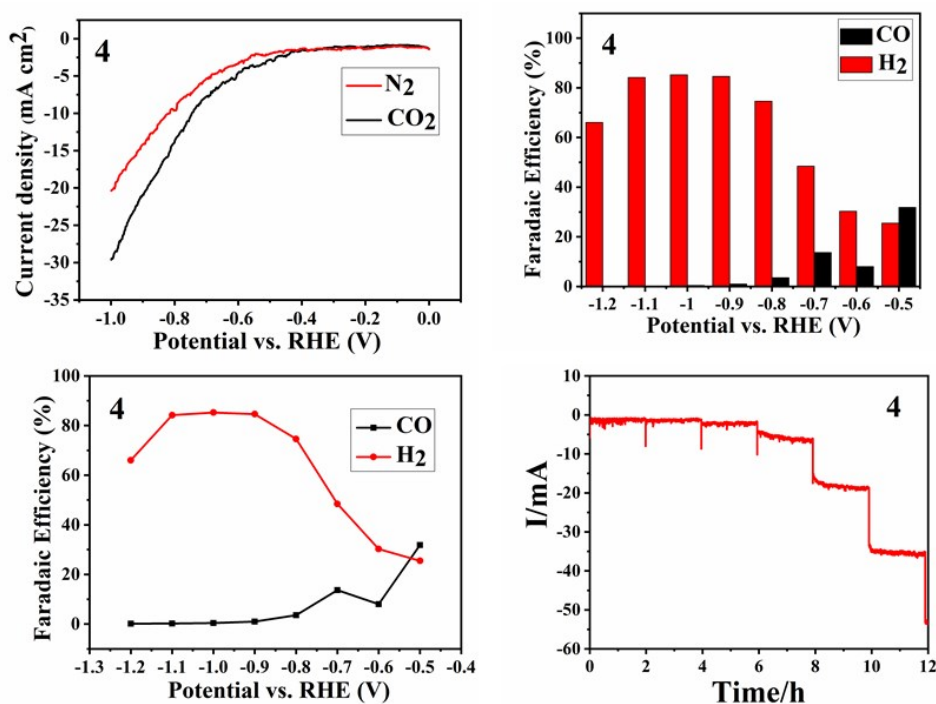

**Fig. S8.** (a) LSV curves of coordination polymer **4** in CO<sub>2</sub>-saturated and N<sub>2</sub>-saturated 0.5 M KHCO<sub>3</sub> electrolyte on carbon paper at a scan rate of 5 mV s<sup>-1</sup>. (b) The FE of **4** for CO (red bars) and H<sub>2</sub> (black bars). (c) The FE of CO and H<sub>2</sub> products on **4** at selected potentials. (d) The i-t curve of **4** during the electrolysis.

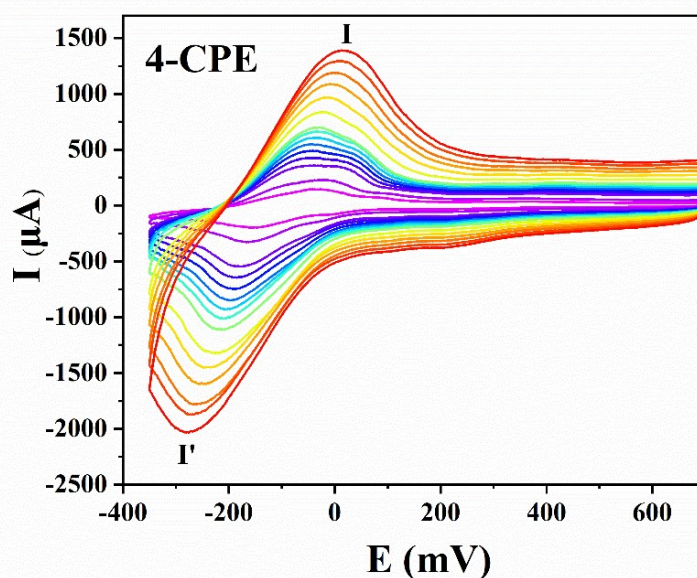

**Fig. S9.** The cyclic voltammograms of the **4**-CPEs in 0.1 M H<sub>2</sub>SO<sub>4</sub> + 0.5 M Na<sub>2</sub>SO<sub>4</sub> aqueous solution at different scan rates (from inner to outer: 20, 40, 60, 80, 100, 120, 140, 160, 180, 200, 250, 300, 350, 400, 450 and 500 mV · s<sup>-1</sup>, respectively).



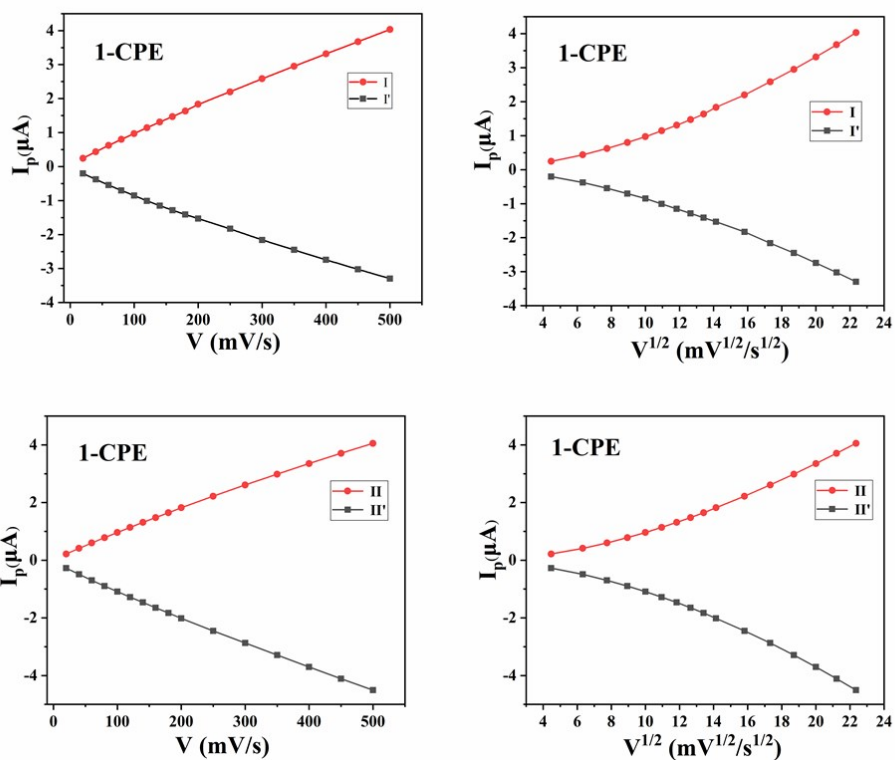

**Fig. S10.** Plots of the anodic and the cathodic peak  $I$ – $I'$  and  $II$ – $II'$  current against  $v$  and  $v^{1/2}$  of 1–CPE.

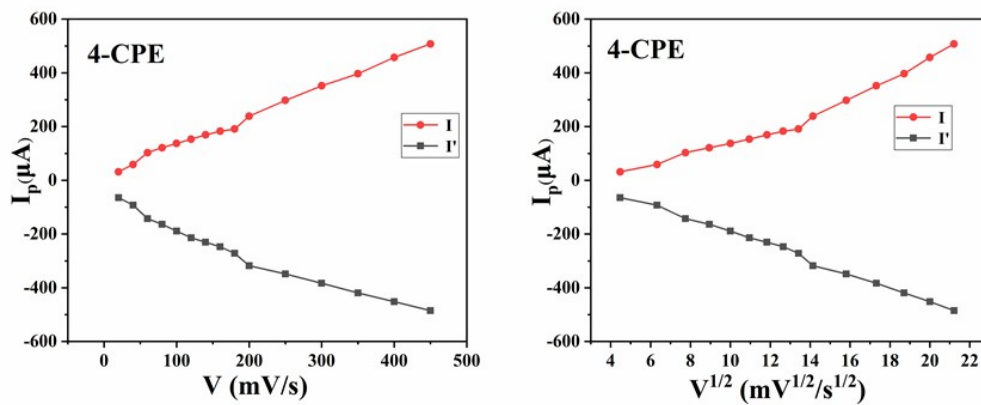

**Fig. S11.** Plots of the anodic and the cathodic peak  $I$ – $I'$  current against  $v$  and  $v^{1/2}$  of 4–CPE.

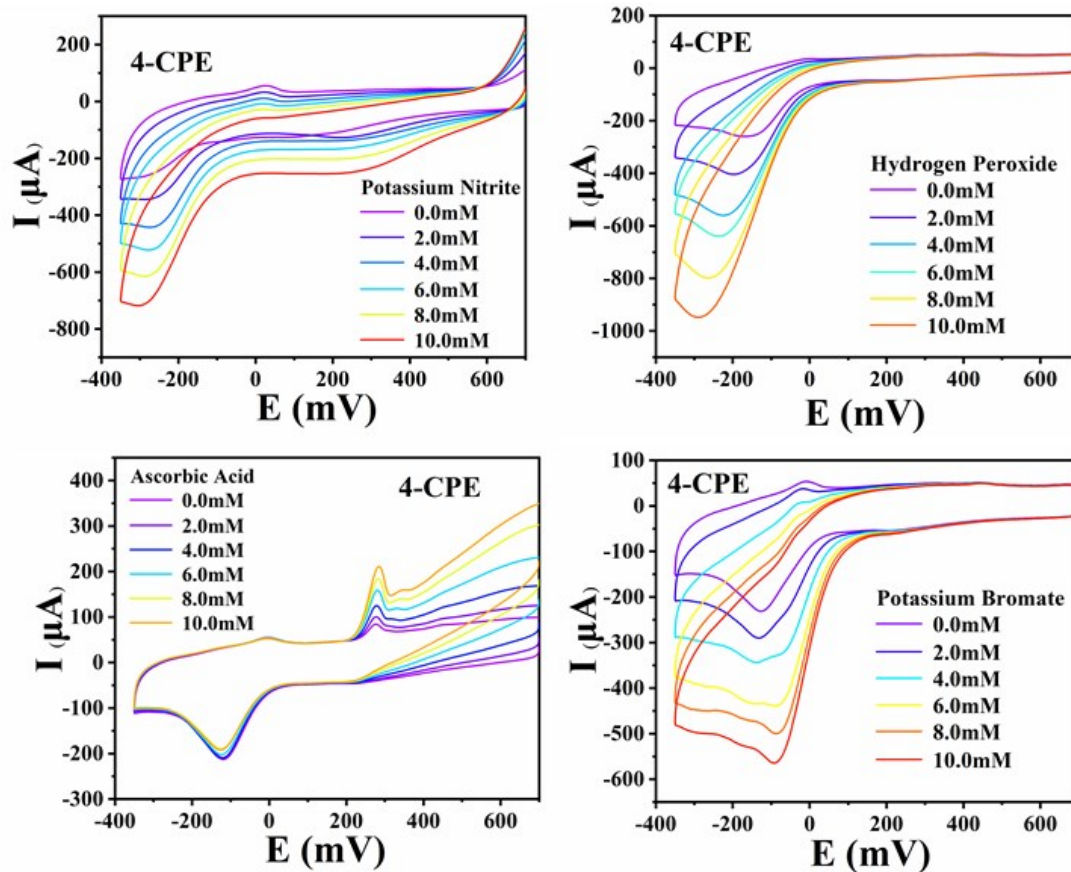

**Fig. S12.** Cyclic voltammograms of the 4-CPE in  $0.1 \text{ M H}_2\text{SO}_4 + 0.5 \text{ M Na}_2\text{SO}_4$  aqueous solution containing 0; 2; 4; 6; 8 and 10 mM  $\text{KNO}_2$ ,  $\text{H}_2\text{O}_2$ , AA and  $\text{KBrO}_3$ . Scan rate:  $250 \text{ mV} \cdot \text{s}^{-1}$ .



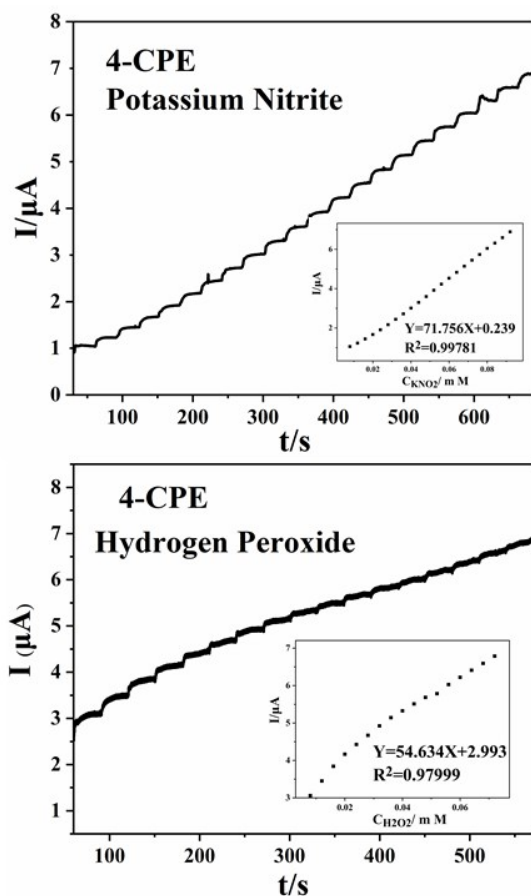

**Fig. S13.** Amperometric response for the 4-CPEs on successive addition of 0.4 mM nitrite and  $\text{H}_2\text{O}_2$  to 0.1 M  $\text{H}_2\text{SO}_4$  + 0.5 M  $\text{Na}_2\text{SO}_4$  aqueous solution. The inset: the steady-state calibration curve for current versus concentration (applied potential: -300 mV).

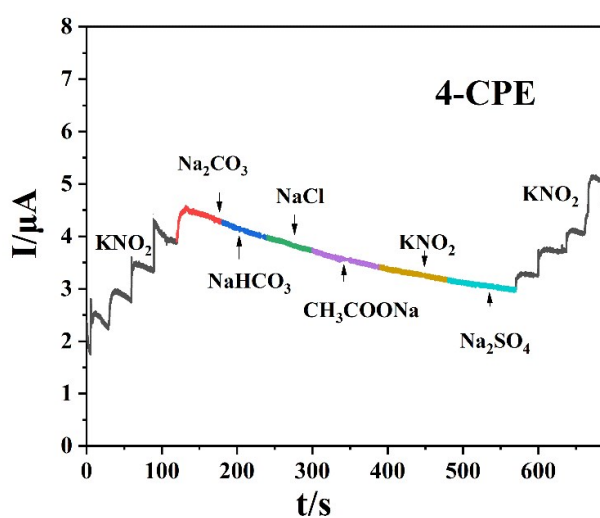

**Fig. S14.** Amperometric current responses of 4-CPE in aqueous solution upon addition of various inorganic salts.

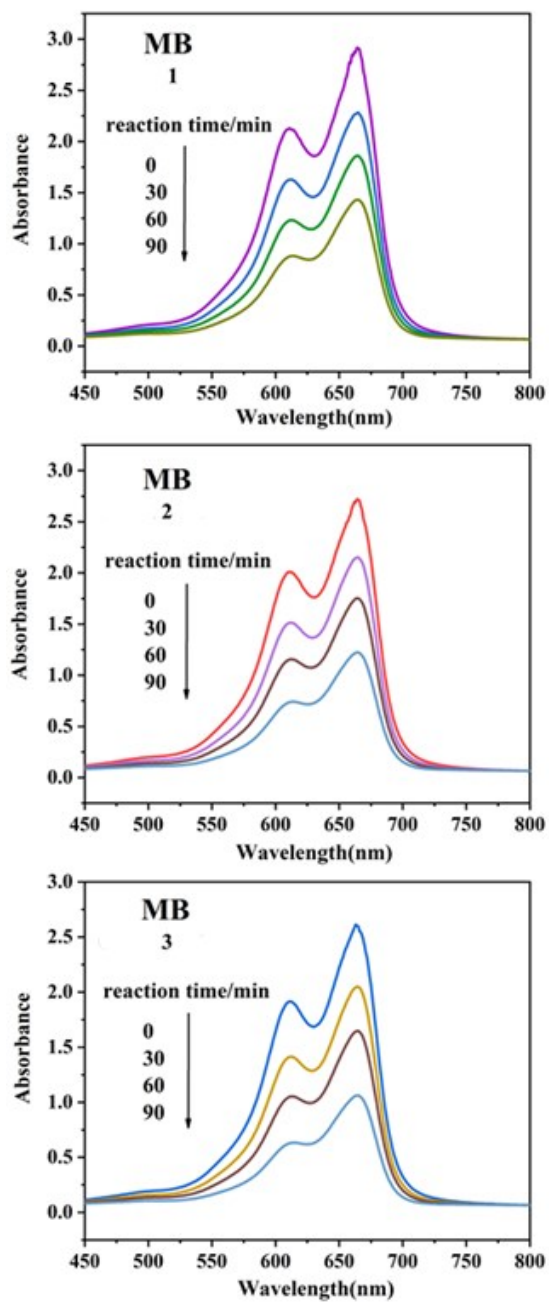

**Fig. S15.** Amperometric current responses of 1–3 CPE in aqueous solution upon addition of various inorganic salts.

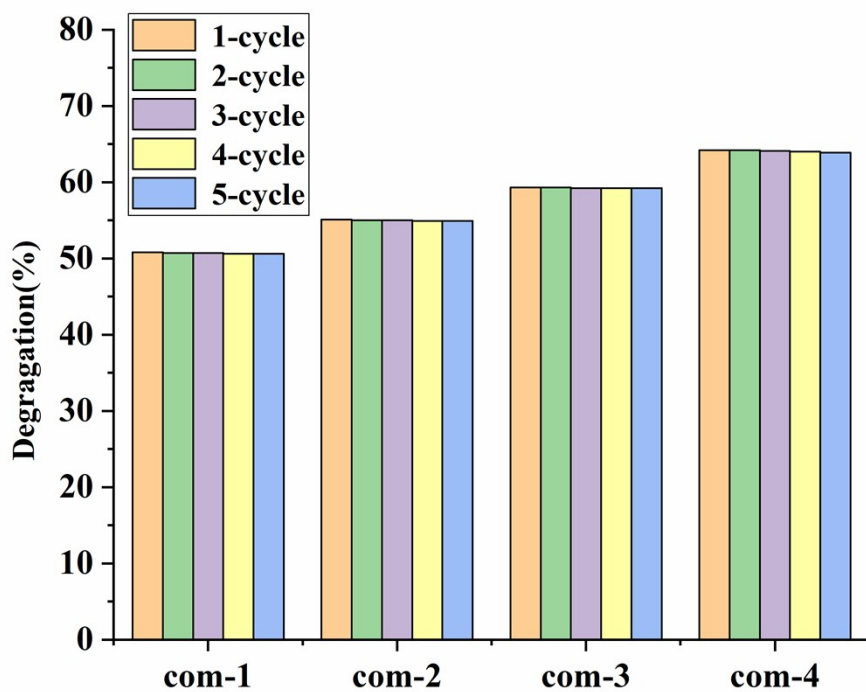

**Fig. S16.** Degradation rates of coordination polymers 1–4 as catalysts in cyclic test.

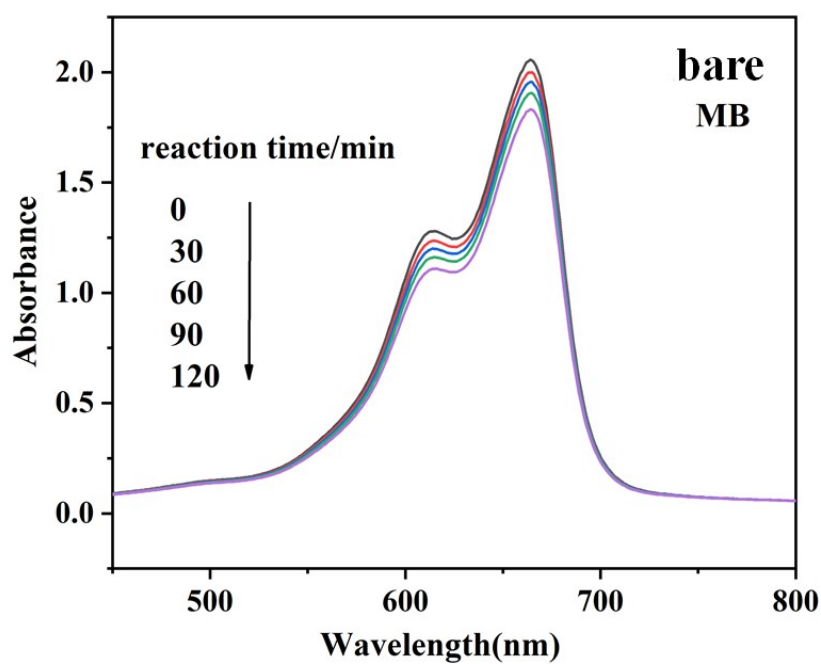

**Fig. S17.** Absorption spectra of the MB solution during the decomposition reaction under UV irradiation without the coordination polymers.

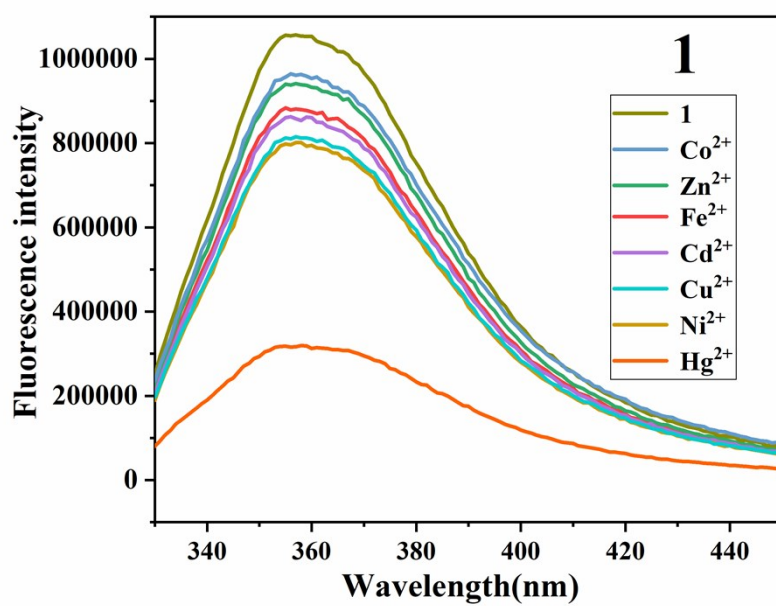

**Fig. S18.** Fluorescence intensity of coordination polymer **1** after adding other metal ions to the solution.

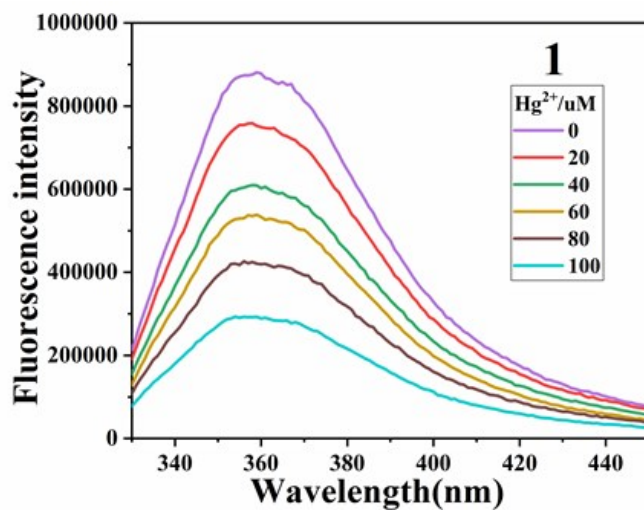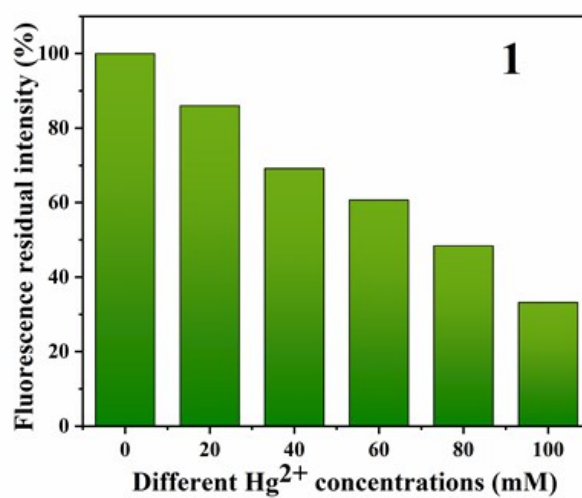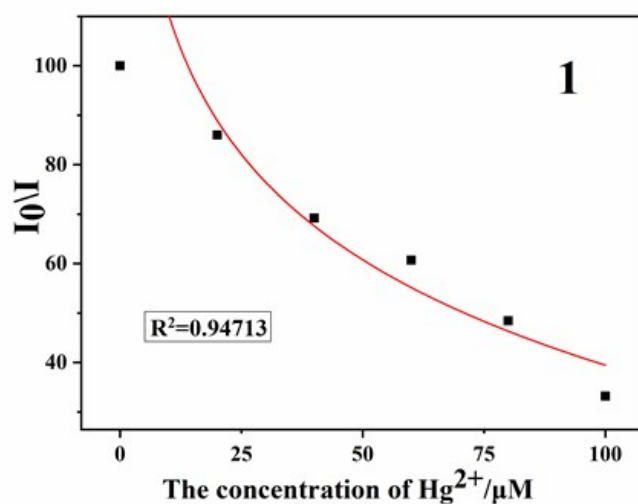

**Fig. S19.** (a) Fluorescence intensity of **1** suspension with the addition of different metal ions (excited at 310 nm); (b) bar chart of fluorescence intensity of **1** suspension with the addition of different metal ions ;(c) Curve fitting of fluorescence intensity changes.
